# Supplementary material for: Nucleosome positioning and kinetics near transcription-start-site barriers are controlled by interplay between active remodeling and DNA sequence
Source: PubMed Central journal article supplement (PMC3874171; doi:10.1093/nar/gkt854), 2013-09-24
Supplement: supp_gkt854_nar-01176-m-2013-File019.pdf [file supp_gkt854_nar-01176-m-2013-File019.pdf]

# SUPPLEMENTARY MATERIALS

## Nucleosome positioning and kinetics near transcription-start-site barriers are controlled by interplay between active remodeling and DNA sequence

Jyotsana J. Parmar, John F. Marko and Ranjith Padinhateeri

### Active nucleosome removal

We follow Kramers rate theory [1] to incorporate ATP-dependent activity, expressing the rates as:

$$r_{\text{off}i}^* = (k_{\text{off}} + k_a e^{\Delta\mu}) e^{V_i} \quad (1)$$

$$= k_{\text{off}} \left( 1 + \frac{k_a}{k_{\text{off}}} e^{\Delta\mu} \right) e^{V_i} \quad (2)$$

$$= k_{\text{off}} e^{V_a} e^{V_i} \quad (3)$$

where  $k_{\text{off}} e^{V_i}$  is the thermal removal rate,  $k_a e^{\Delta\mu}$  is the ATP-dependent active contribution, and  $V_a = \ln \left( 1 + \frac{k_a}{k_{\text{off}}} e^{\Delta\mu} \right)$ . We have taken  $V_a$  to be a constant. This is an idealization as the active contribution depends on ATP/ADP concentration ( $\Delta\mu$  is a function of ATP and ADP concentration) as well as on the concentration of the remodellers and their specificity (represented by  $k_a$ ).

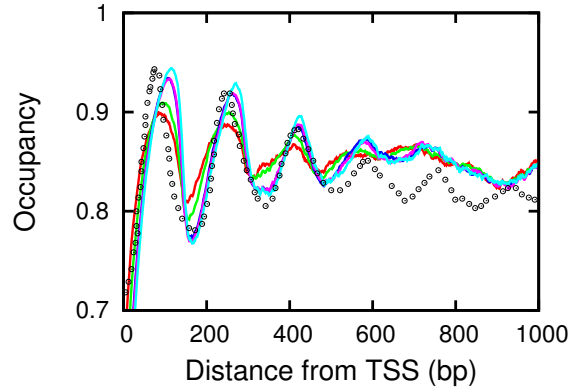

Fig. S1: Nucleosome occupancy next to a soft barrier. Each curve is computed by changing the slope ( $m$ ) of the potential that forms the barrier. Red:  $m = -5/150$ , Green:  $m = -7/150$ , Blue:  $m = -12/150$ , Pink:  $m = -13/150$ , Cyan:  $m = -17/150$ . Black circles are the experimental data [2]. In our simulations (presented in main text) we have taken  $m = -13/150$  (soft barrier corresponding to the pink curve). All the curves here are with  $V_{\text{eff}} = -7k_B T$  and  $\alpha_p = 0.0024s^{-1}$ .

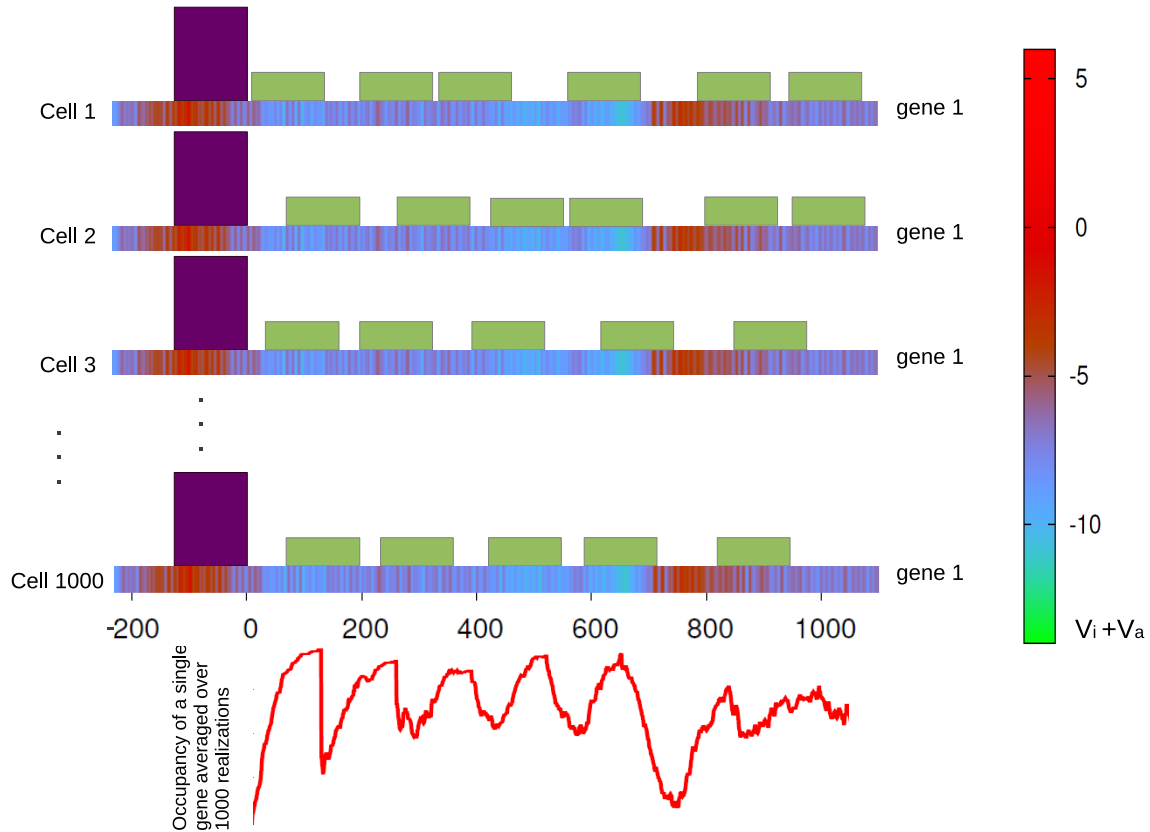

Fig. S2: Schematic depiction of our “replica” averaging: Average occupancy on a given region (e.g., gene 1), is computed by performing 1000 simulations, with all parameters being the same. The color gradient on the lattice represents DNA-histone binding potential, where red corresponds to more repulsive sequence. Green blocks represent nucleosomes and the purple block represents the hard physical barrier.

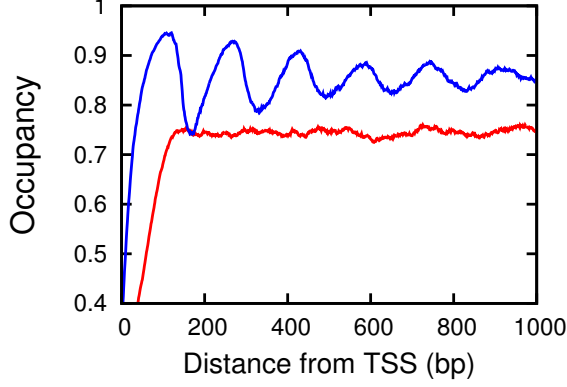

Fig. S3: Nucleosome occupancy in presence of a soft barrier on a homogeneous DNA with remodeling activity (blue) ( $V_{\text{eff}} = -7k_B T$  and  $\alpha_p = 0.0024s^{-1}$ ) and without any remodeling activity (red) ( $V_{\text{eff}} = -42k_B T$  and  $\alpha_p = 0$ ).

### Nucleosome positioning at thermal equilibrium

To calculate nucleosome positioning at thermal equilibrium, we used the model from Ref. [3]. In this model, the  $N$ -nucleosome energy is given by

$$H = \sum_{i=1}^N U(n_{i+1} - n_i) + \sum_{i=1}^N V_{n_i} \quad (4)$$

where  $n_i$  is the starting position of  $i^{\text{th}}$  nucleosome,  $U(m)$  is the nucleosome hard-core interaction potential and  $V_n$  is the sequence-dependent binding potential energy. Based on the calculations by Percus [4], the equilibrium probability ( $p_i$ ) of finding a nucleosome starting at location  $i$  satisfies the relation [3]

$$h_i = p_i \frac{1}{\left(1 - \sum_{j=1}^{k-1} p_{i-j}\right)} \quad (5)$$

where,  $h_n = \frac{H_n e^{\beta(\mu - V_n)}}{1 + H_n e^{\beta(\mu - V_n)}}$ , and,  $H_n = \prod_{m=2}^k (1 - h_{n+m-1})$ ; here  $\mu$  is the chemical potential, equivalent to our ATP-dependent energy  $V_a$  and  $k$  is the size of the nucleosome. In our calculation, we take  $\langle \mu - V_n \rangle = -V_{\text{eff}}$ .

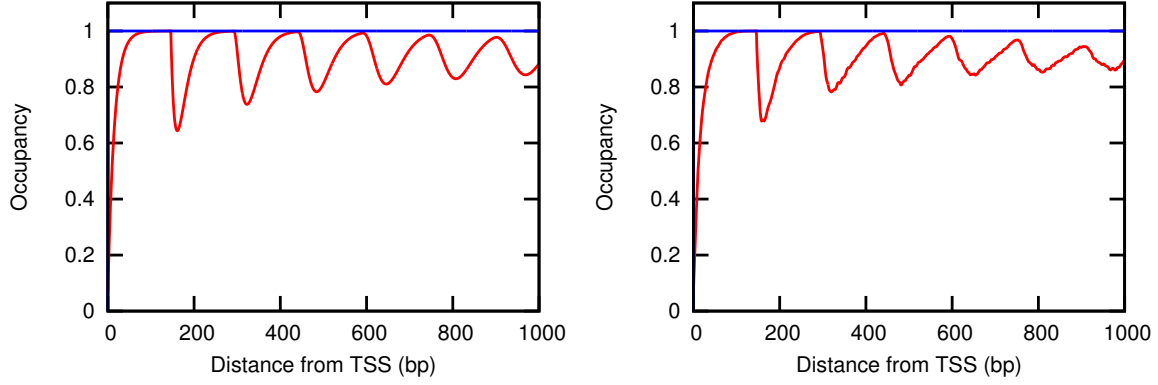

Fig. S4: Nucleosome occupancy based on equilibrium statistical mechanics computation using Percus equation for homogeneous DNA (left) and for average of 100 genes (right). Blue: occupancy for parameters corresponding to non-ATP conditions: ( $V_{\text{eff}} = -42k_B T$ ). Since purely thermal events, at physiological temperature, cannot lead to any significant nucleosome disassembly, the resulting occupancy is nearly 1 everywhere. Red: Parameters are chosen such a way ( $V_{\text{eff}} = -7k_B T$ ) that the average occupancy is around 88%.

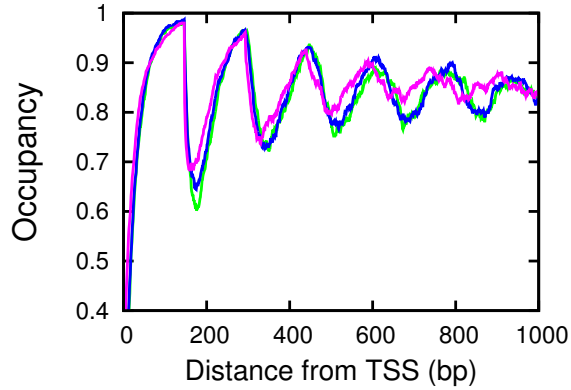

Fig. S5: Nucleosome occupancy on a homogeneous DNA in presence of a hard barrier with different sliding rates: Green:  $\alpha_p = 0.000024s^{-1}$ , Blue:  $\alpha_p = 0.00024s^{-1}$ , and pink:  $\alpha_p = 0.0024s^{-1}$ . Nucleosome removal rate is the same for all the curves ( $V_{\text{eff}} = -7k_B T$ ). Note that the change in sliding rate does not affect the overall occupancy pattern significantly.

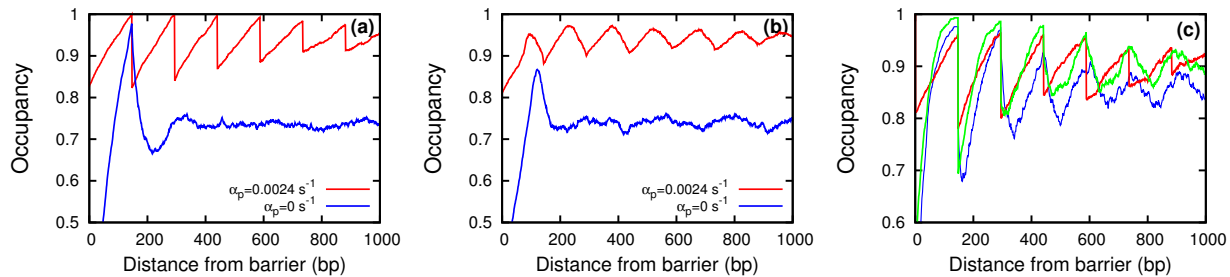

Fig. S6: Effect of sliding on nucleosome occupancy (with homogeneous sequence) in the presence of hard barrier (a), and soft barrier (b). Red curves in (a) and (b) show occupancy with parameters  $\alpha_p = 0.0024 s^{-1}$  and  $V_{\text{eff}} = -15k_B T$ , whereas blue curves show occupancy with  $\alpha_p = 0$  and  $V_{\text{eff}} = -15k_B T$ . This shows that, as far as statistical positioning is concerned, sliding becomes important when the removal activity is small ( $V_{\text{eff}} = -15k_B T$ ). However, low removal activity would lead to very high density of nucleosomes. In (c), we stop the binding and dissociation events, once the density is reached 88%. After reaching the density of 88%, simulation is run for one hour, for  $\alpha_p = 0.0024 s^{-1}$  (red) and  $\alpha_p = 0.00024 s^{-1}$  (green). Then we compare this with our normal occupancy pattern (blue, with active sliding and disassembly throughout the simulation with  $V_{\text{eff}} = -7k_B T$  and  $\alpha_p = 0.0024 s^{-1}$ ).

### Gene regions considered in this study:

In this paper, we study nucleosome organization in the ORF regions of 100 yeast genes (NCBI database) with known transcription start sites (TSS) [5]. As per Ref. [5], the 100 top verified genes with known TSS were chosen. These genes are highly expressed genes having  $>10$  mRNA copies per cell. We simulated nucleosome kinetics in all these 100 gene regions, and computed occupancy and site exposure kinetics as described in the main text. Below we list all the 100 genes used in this study.

| No. | Chromosome | ORF     |
|-----|------------|---------|
| 1   | III        | YCR012W |
| 2   | VIII       | YHR021C |
| 3   | XII        | YLR110C |
| 4   | XVI        | YPL079W |
| 5   | XII        | YLR075W |
| 6   | IX         | YIL018W |
| 7   | VII        | YGR118W |
| 8   | XIV        | YNL178W |
| 9   | XII        | YLR167W |
| 10  | IV         | YDR382W |
| 11  | XV         | YOR182C |
| 12  | I          | YAL038W |
| 13  | XV         | YOL086C |
| 14  | V          | YER117W |
| 15  | VII        | YGL031C |
| 16  | VIII       | YHR010W |
| 17  | VII        | YGL123W |
| 18  | XVI        | YPR080W |
| 19  | II         | YBR118W |
| 20  | XV         | YOL039W |
| 21  | V          | YER102W |
| 22  | X          | YJL189W |

| No. | Chromosome | ORF     |
|-----|------------|---------|
| 23  | VIII       | YHR203C |
| 24  | XV         | YOL121C |
| 25  | II         | YBR010W |
| 26  | XVI        | YPL143W |
| 27  | IV         | YDL075W |
| 28  | VII        | YGR034W |
| 29  | II         | YBR031W |
| 30  | IV         | YDL229W |
| 31  | XIII       | YMR116C |
| 32  | XII        | YLR044C |
| 33  | XIV        | YNL302C |
| 34  | XVI        | YPR043W |
| 35  | XVI        | YPR132W |
| 36  | IV         | YDL191W |
| 37  | IV         | YDL130W |
| 38  | XV         | YOR293W |
| 39  | XV         | YOL109W |
| 40  | X          | YJL190C |
| 41  | VII        | YGL147C |
| 42  | VII        | YGR192C |
| 43  | XIV        | YNL031C |
| 44  | X          | YJR123W |
| 45  | II         | YBL092W |
| 46  | XVI        | YPL131W |
| 47  | XV         | YOR063W |
| 48  | VII        | YGL030W |
| 49  | XV         | YOR234C |
| 50  | XIII       | YML024W |
| 51  | XVI        | YNL145W |
| 52  | XV         | YOR369C |
| 53  | IX         | YIL052C |



| No. | Chromosome | ORF     |
|-----|------------|---------|
| 54  | IV         | YDR447C |
| 55  | IV         | YDL081C |
| 56  | X          | YJR009C |
| 57  | II         | YBR181C |
| 58  | IV         | YDR450W |
| 59  | III        | YCR031C |
| 60  | XV         | YOR167C |
| 61  | XII        | YLR441C |
| 62  | VI         | YFR031C |
| 63  | XV         | YOL040C |
| 64  | VII        | YGL135W |
| 65  | VIII       | YHR174W |
| 66  | VII        | YGR148C |
| 67  | II         | YBL087C |
| 68  | IV         | YDR050C |
| 69  | VII        | YGR085C |
| 70  | XI         | YKL152C |
| 71  | IV         | YDL136W |
| 72  | XII        | YLR185W |
| 73  | XIV        | YNL162W |
| 74  | XV         | YOL120C |
| 75  | IV         | YDL083C |
| 76  | X          | YJR094W |
| 77  | XI         | YKL180W |
| 78  | XV         | YOR312C |
| 79  | II         | YBR189W |
| 80  | X          | YJR145C |
| 81  | V          | YEL034W |
| 82  | XIII       | YML028W |
| 83  | IV         | YDR012W |
| 84  | XII        | YLR340W |

| No. | Chromosome | ORF     |
|-----|------------|---------|
| 85  | II         | YBL003C |
| 86  | VIII       | YHR141C |
| 87  | XII        | YLR029C |
| 88  | XII        | YLR406C |
| 89  | XII        | YLR300W |
| 90  | II         | YBL027W |
| 91  | IV         | YDR033W |
| 92  | XII        | YLL045C |
| 93  | IV         | YDL061C |
| 94  | IV         | YDR471W |
| 95  | XVI        | YPL037C |
| 96  | IV         | YDR276C |
| 97  | XIV        | YNL135C |
| 98  | IV         | YDR224C |
| 99  | XII        | YLR333C |
| 100 | VII        | YGR209C |

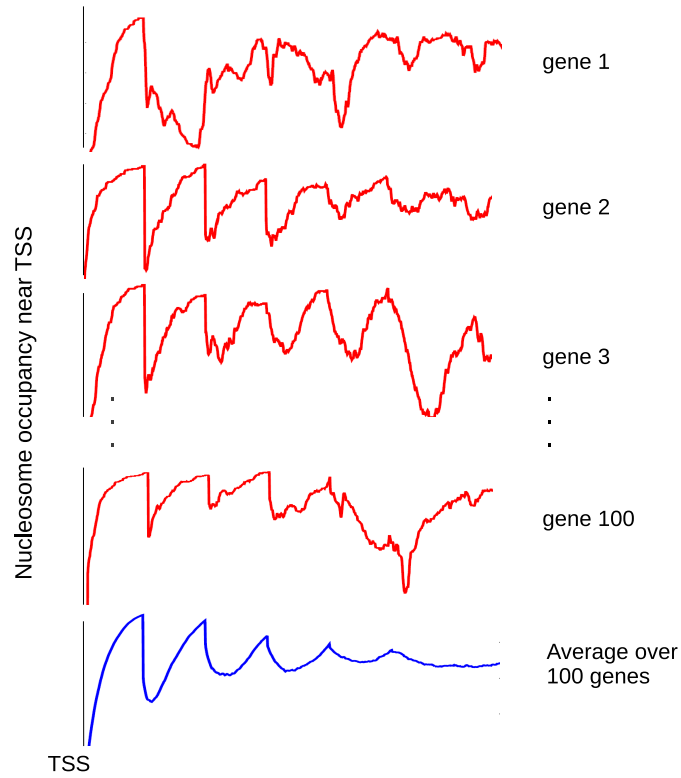

Fig. S 7: Procedure to compute gene-averaged nucleosome occupancy: First, occupancies for individual genes are generated as shown in Fig. S2 (red curves). Then these curves are averaged to obtain the gene-averaged occupancy (blue curve).

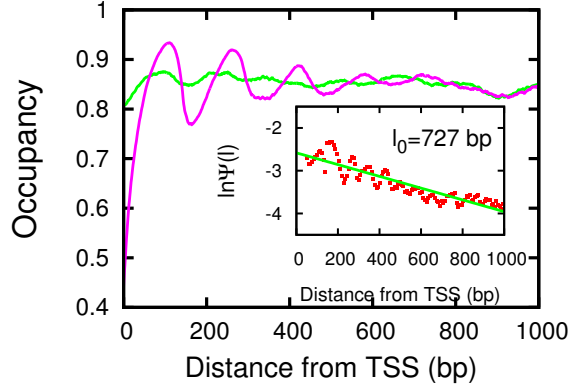

Fig. S8: Nucleosome occupancy averaged over 100 genes ( $V_{\text{eff}} = -7k_B T$  and  $\alpha_p = 0.0024s^{-1}$ ) in the presence of a soft barrier (pink), and in the absence of any barrier (green). Inset: the gene-averaged deviation of profiles with and without soft barrier decays on a  $\approx 727$  bp, very similar to the result from the hard barrier ( $\approx 733$  bp).

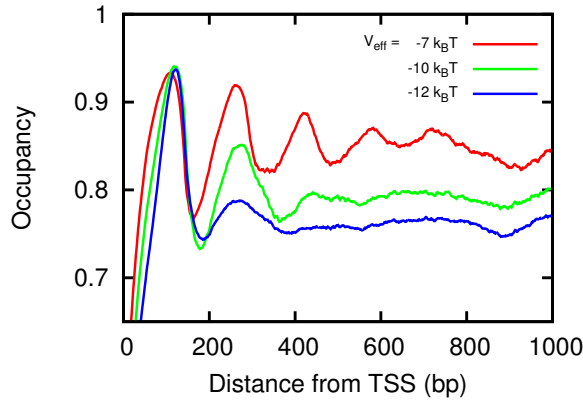

Fig. S9: Effect of remodeling on nucleosome occupancy (soft barrier). Red curve represents:  $V_{\text{eff}} = -7k_B T$  and  $\alpha = 0.0024 s^{-1}$ ; green curve is with lesser activity, i.e. ( $V_{\text{eff}} = -10k_B T$  and no sliding), and blue curve is with even lesser activity i.e. ( $V_{\text{eff}} = -12k_B T$  and no sliding). The shape of the occupancy profiles here are qualitatively similar to the ones observed by Gkikopoulos et al [6], when a set of major remodellers are deleted/disrupted. The simulation results here are averaged over 100 genes.

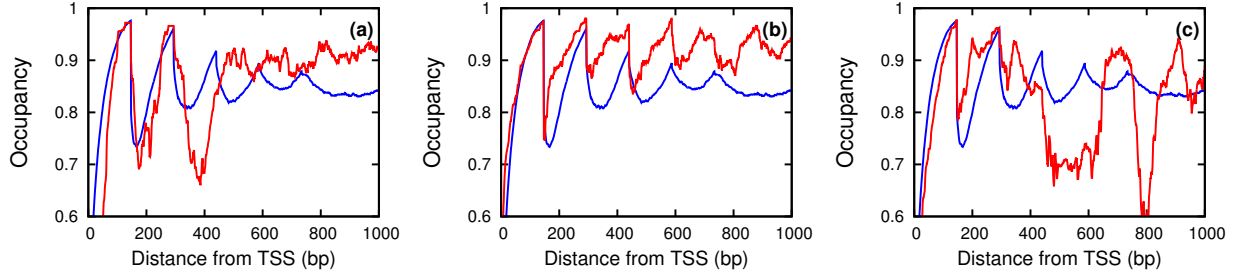

Fig. S10: Nucleosome occupancy near a hard barrier for three individual genes (a) YIL018W, chromosome IX, (b) YCR012W, chromosome III, (c) YDR382W, chromosome IV (red curves in each plot) compared with the occupancy averaged over 100 genes (blue curves). For all the three plots,  $V_{\text{eff}} = -7k_B T$  and  $\alpha_p = 0.0024s^{-1}$ .

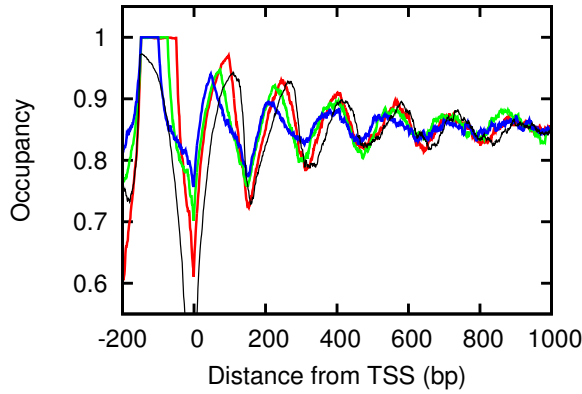

Fig. S11: Nucleosome occupancy with a strongly absorbing TSS (sink): First time, when a nucleosome comes into a specified region (region between  $j=-147$  and  $j=-147-x$ ), it gets absorbed there (like a sink) permanently. Nucleosome occupancy for  $x=50$  bp (red),  $x=74$  bp (green) and  $x=100$  bp (blue); occupancy in presence of a soft barrier (black). This shows that a nucleosome sink can also cause statistical positioning. For all the curves,  $\alpha_p = 0.0024s^{-1}$  and  $V_{\text{eff}} = -7k_B T$ .  $j$  is the distance from TSS in bp.

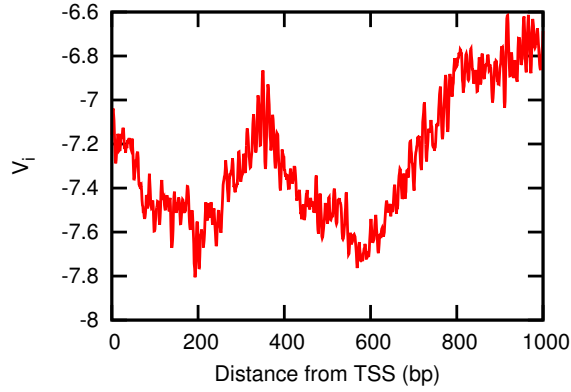

Fig. S12: Sequence dependent potential averaged over 100 genes near TSS. Note that this shape of the potential is reflected in the number of exposure events in the main text.

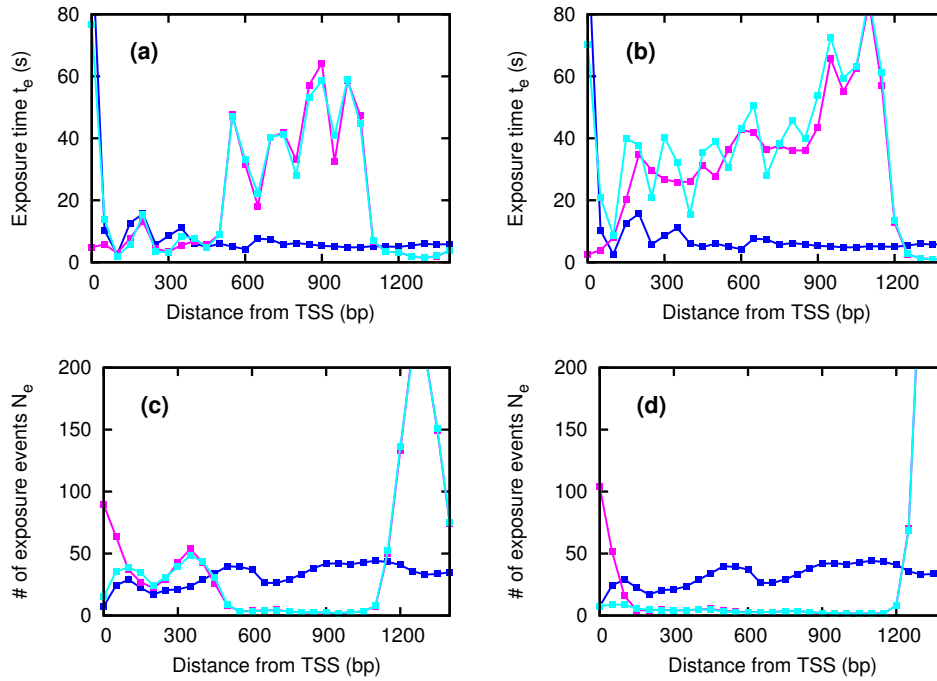

Fig. S13: Average exposure time ( $t_e$ ) and number of exposure events  $N_e$  for two individual genes. The left figures (a) and (c) are for gene YIL018W (Chromosome IX) and right figures (b) and (d) are for the gene YCR012W (Chromosome III). In all the figures, blue: behavior near a hard barrier averaged over 100 genes; cyan: for individual gene in the presence of a hard barrier; pink: for individual gene in the absence of any barrier. In all the plots,  $V_{\text{eff}} = -7k_B T$  and  $\alpha_p = 0.0024s^{-1}$ .

## Number of exposure event is highly sensitive to small change in potential

To examine how a small change in potential influences the nucleosome coverage and number of exposure events, we computed derivatives (finite difference) of average equilibrium density ( $\rho_{eq}$ ) and number of exposure events ( $N_e$ ) with respect to potential ( $V_{eff}$ ) as follows:

$$\gamma_\rho = \frac{\Delta\rho_{eq}}{\Delta V_{eff}} \quad (6)$$

$$\gamma_N = \frac{\Delta N_e}{\Delta V_{eff}} \quad (7)$$

These are computed from simulation data on homogeneous sequences with various  $V_{eff}$ . The results presented in Fig. S14 (left) show that change in number of exposure events is much higher than the change in density. To convert it to a percentage change, we computed:

$$\phi_\rho = \frac{1}{\rho_{eq}} \frac{\Delta\rho_{eq}}{\Delta V_{eff}} \times 100 \quad (8)$$

$$\phi_N = \frac{1}{N_e} \frac{\Delta N_e}{\Delta V_{eff}} \times 100 \quad (9)$$

These quantities plotted in Fig. S14 (right) show that a  $1k_B T$  change in potential energy can induce a 100% change in the number of exposure events, while the average density change is only  $\approx 2\%$ .

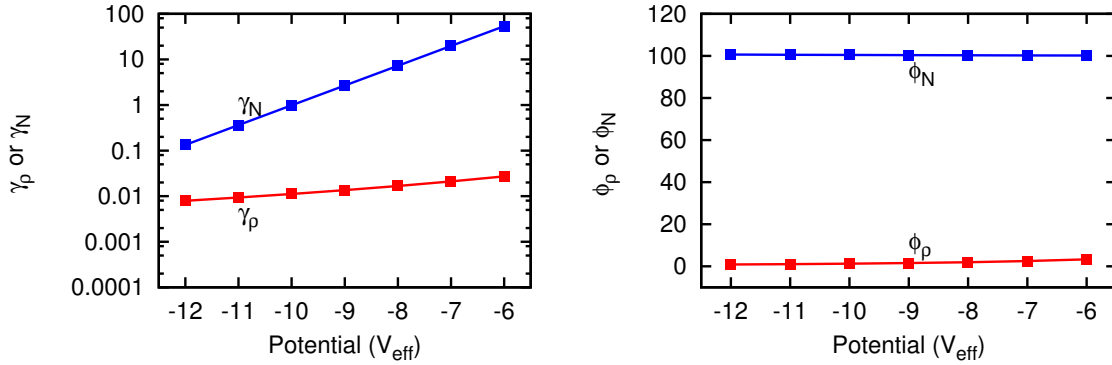

Fig. S14: (left): Equilibrium density-change when the effective potential is changed ( $\gamma_\rho = \frac{\Delta\rho_{eq}}{\Delta V_{eff}}$ ); number of exposure events-change when the effective potential is changed ( $\gamma_N = \frac{\Delta N_e}{\Delta V_{eff}}$ ). (right) The same quantities expressed as percentage change: percentage change in equilibrium density ( $\phi_\rho = \frac{1}{\rho_{eq}} \frac{\Delta\rho_{eq}}{\Delta V_{eff}} \times 100$ ); percentage change in number of exposure events ( $\phi_N = \frac{1}{N_e} \frac{\Delta N_e}{\Delta V_{eff}} \times 100$ ).

- 
- [1] Kafri Y, Lubensky DK, Nelson DR (2004) Dynamics of Molecular Motors and Polymer Translocation with Sequence Heterogeneity. *Biophys. J.* 86:3373–3391.
- [2] Zhang Z, et al. (2011) A Packing Mechanism for Nucleosome Organization Reconstituted Across a Eukaryotic Genome. *Science* 332:977–980.
- [3] Schwab DJ, Bruinsma RF, Rudnick J, Widom J (2008) Nucleosome Switches. *Phys. Rev. Lett.* 100:228105.
- [4] Percus JK (1976) Model for density variation at a fluid surface. *J. Stat. Phys.* 15:423–435.
- [5] Zhang Z, Dietrich FS (2005) Mapping of transcription start sites in *Saccharomyces cerevisiae* using 5' SAGE. *Nucleic Acids Res.* 33:2838–2851.
- [6] Gkikopoulos T, et al. (2011) A role for Snf2-related nucleosome-spacing enzymes in genome-wide nucleosome organization. *Science* 333:1758–1760.
